# Supplementary material
Source: Royal Society of Chemistry journal article supplement (doi:10.1039/d5fo05107j)
Supplement: d5fo05107j1.pdf [file d5fo05107j1.pdf]

## Supplementary information

Table S1 The potential bioactive peptides in fermented camel milk

| Sequence          | Mass   | Length | Location            | Peptide Ranker | Activity                                                                                                                                                                                       |
|-------------------|--------|--------|---------------------|----------------|------------------------------------------------------------------------------------------------------------------------------------------------------------------------------------------------|
| AYPFIPT           | 807.4  | 7      | FCM7, 17            | 0.8561         | ACE inhibitor, dipeptidyl peptidase IV inhibitor, alpha-glucosidase inhibitor, dipeptidyl peptidase III inhibitor, tubulin-tyrosine ligase inhibitor, hypouricemic                             |
| FLPPLQP           | 810.5  | 7      | FCM3, 7, 15, 17, 19 | 0.8212         | ACE inhibitor, dipeptidyl peptidase IV inhibitor, alpha-glucosidase inhibitor, dipeptidyl peptidase III inhibitor, lactocepin inhibitor                                                        |
| FLPPLQPAVM        | 1111.6 | 10     | FCM17               | 0.8233         | ACE inhibitor, dipeptidyl peptidase IV inhibitor, alpha-glucosidase inhibitor, dipeptidyl peptidase III inhibitor, lactocepin inhibitor, inhibitor of tripeptidyl peptidase II                 |
| FLPPLQPAVMVPF     | 1454.8 | 13     | FCM3, 15, 17, 19    | 0.8947         | ACE inhibitor, dipeptidyl peptidase IV inhibitor, alpha-glucosidase inhibitor, dipeptidyl peptidase III inhibitor, ACE2 inhibitor, lactocepin inhibitor, inhibitor of tripeptidyl peptidase II |
| GGAGGF            | 464.2  | 6      | FCM7                | 0.8597         | ACE inhibitor, antioxidative, dipeptidyl peptidase IV inhibitor, inhibitor of tripeptidyl peptidase II, inhibitor of cytosol alanine aminopeptidase                                            |
| GRGWNKGAHAGPTWNPI | 1931.0 | 18     | FCM3, 7, 17         | 0.8168         | ACE inhibitor, antioxidative, dipeptidyl peptidase IV inhibitor, hypouricemic, inhibitor of tripeptidyl peptidase II                                                                           |
| IIPPPP            | 632.4  | 6      | FCM3, 15            | 0.8317         | ACE inhibitor, anti inflammatory, dipeptidyl peptidase IV inhibitor, alpha-glucosidase inhibitor                                                                                               |
| ILPPPP            | 632.4  | 6      | FCM3, 15            | 0.8652         | ACE inhibitor, dipeptidyl peptidase IV inhibitor, alpha-glucosidase inhibitor, dipeptidyl peptidase III inhibitor, ACE2 inhibitor, lactocepin inhibitor                                        |
| IPIPLP            | 648.4  | 6      | FCM7                | 0.8357         | ACE inhibitor, dipeptidyl peptidase IV inhibitor, lactocepin inhibitor                                                                                                                         |
| IPIPPP            | 632.4  | 6      | FCM3, 7, 15, 17, 19 | 0.8330         | ACE inhibitor, dipeptidyl peptidase IV inhibitor, anti inflammatory, alpha-glucosidase inhibitor                                                                                               |
| IPLPLP            | 648.4  | 6      | FCM7                | 0.8422         | ACE inhibitor, antioxidative, hypotensive, dipeptidyl peptidase IV inhibitor, lactocepin inhibitor                                                                                             |

|                          |        |    |                     |        |                                                                                                                                                                                                 |
|--------------------------|--------|----|---------------------|--------|-------------------------------------------------------------------------------------------------------------------------------------------------------------------------------------------------|
| IPLPPP                   | 632.4  | 6  | FCM3, 7, 15, 17, 19 | 0.8531 | ACE inhibitor, antioxidative, hypotensive, dipeptidyl peptidase IV inhibitor, lactocepain inhibitor                                                                                             |
| IPPLPP                   | 632.4  | 6  | FCM3, 7, 15, 19     | 0.8817 | ACE inhibitor, anti inflammatory, dipeptidyl peptidase IV inhibitor, alpha-glucosidase inhibitor, lactocepain inhibitor                                                                         |
| LIPPPP                   | 632.4  | 6  | FCM3, 15            | 0.8272 | ACE inhibitor, anti inflammatory, dipeptidyl peptidase IV inhibitor, alpha-glucosidase inhibitor                                                                                                |
| LIPPPPPPP                | 923.5  | 9  | FCM3, 7, 15, 19     | 0.9007 | ACE inhibitor, anti inflammatory, dipeptidyl peptidase IV inhibitor, alpha-glucosidase inhibitor, ACE2 inhibitor                                                                                |
| LLPPPP                   | 632.4  | 6  | FCM3, 15            | 0.8461 | ACE inhibitor, dipeptidyl peptidase IV inhibitor, alpha-glucosidase inhibitor, inhibitor of cytosol alanyl aminopeptidase, lactocepain inhibitor                                                |
| LLPPPPPPPP               | 923.5  | 9  | FCM3, 7, 15, 19     | 0.8892 | ACE inhibitor, dipeptidyl peptidase IV inhibitor, alpha-glucosidase inhibitor, inhibitor of cytosol alanyl aminopeptidase, lactocepain inhibitor                                                |
| LPIPLP                   | 648.4  | 6  | FCM7                | 0.8269 | ACE inhibitor, dipeptidyl peptidase IV inhibitor, lactocepain inhibitor                                                                                                                         |
| LPIPPP                   | 632.4  | 6  | FCM3, 7, 15, 17, 19 | 0.8248 | ACE inhibitor, anti inflammatory, dipeptidyl peptidase IV inhibitor, alpha-glucosidase inhibitor                                                                                                |
| LPLPLP                   | 648.4  | 6  | FCM7                | 0.8411 | ACE inhibitor, antioxidative, hypotensive, dipeptidyl peptidase IV inhibitor, lactocepain inhibitor                                                                                             |
| LPLPPP                   | 632.4  | 6  | FCM3, 7, 15, 17, 19 | 0.8533 | ACE inhibitor, antioxidative, hypotensive, dipeptidyl peptidase IV inhibitor, lactocepain inhibitor, alpha-glucosidase inhibitor                                                                |
| LPPLPLP                  | 745.5  | 7  | FCM7, 15            | 0.9030 | ACE inhibitor, antioxidative, hypotensive, dipeptidyl peptidase IV inhibitor, lactocepain inhibitor, alpha-glucosidase inhibitor                                                                |
| LPPLPP                   | 632.4  | 6  | FCM3, 7, 15, 19     | 0.8761 | ACE inhibitor, dipeptidyl peptidase IV inhibitor, alpha-glucosidase inhibitor, ACE2 inhibitor, lactocepain inhibitor                                                                            |
| LPPLQPAVMVPF             | 1307.7 | 12 | FCM3, 7, 15, 17, 19 | 0.8179 | ACE inhibitor, dipeptidyl peptidase IV inhibitor, alpha-glucosidase inhibitor, ACE2 inhibitor, lactocepain inhibitor, dipeptidyl peptidase III inhibitor, inhibitor of tripeptidyl peptidase II |
| NFLPPLQPAVMVPF           | 1568.8 | 14 | FCM3, 7, 15, 17, 19 | 0.8575 | ACE inhibitor, dipeptidyl peptidase IV inhibitor, alpha-glucosidase inhibitor, ACE2 inhibitor, lactocepain inhibitor, dipeptidyl peptidase III inhibitor, inhibitor of tripeptidyl peptidase II |
| NFLPPLQPAVMVPFLQPKV<br>M | 2265.2 | 20 | FCM7                | 0.8412 | ACE inhibitor, antioxidative, dipeptidyl peptidase IV inhibitor, alpha-glucosidase inhibitor, ACE2 inhibitor, lactocepain inhibitor, dipeptidyl peptidase                                       |

|           |        |    |                        |        |                                                                                                                                                                                                                        |
|-----------|--------|----|------------------------|--------|------------------------------------------------------------------------------------------------------------------------------------------------------------------------------------------------------------------------|
| PAPPPPPPP | 865.5  | 9  | FCM15                  | 0.9632 | III inhibitor, inhibitor of tripeptidyl peptidase II<br>ACE inhibitor, dipeptidyl peptidase IV inhibitor,<br>alpha-glucosidase inhibitor, inhibitor of tripeptidyl<br>peptidase II, peptidylprolyl isomerase inhibitor |
| PLLPPPPPP | 923.5  | 9  | FCM3                   | 0.8396 | ACE inhibitor, dipeptidyl peptidase IV inhibitor,<br>alpha-glucosidase inhibitor, ACE2 inhibitor,<br>lactocepin inhibitor, stimulating                                                                                 |
| PPIPIP    | 632.4  | 6  | FCM3, 7,<br>15         | 0.8698 | ACE inhibitor, dipeptidyl peptidase IV inhibitor,<br>alpha-glucosidase inhibitor, inhibitor of tripeptidyl<br>peptidase II                                                                                             |
| PPLPIP    | 632.4  | 6  | FCM3, 7,<br>15         | 0.8687 | ACE inhibitor, dipeptidyl peptidase IV inhibitor,<br>alpha-glucosidase inhibitor, lactocepin inhibitor                                                                                                                 |
| PPLPLP    | 632.4  | 6  | FCM3, 7,<br>15         | 0.9180 | ACE inhibitor, antioxidative, hypotensive,<br>dipeptidyl peptidase IV inhibitor, alpha-<br>glucosidase inhibitor, lactocepin inhibitor                                                                                 |
| PQFFQL    | 778.4  | 6  | FCM3, 7,<br>15, 17, 19 | 0.9120 | ACE inhibitor, dipeptidyl peptidase IV inhibitor,<br>pseudolysin inhibitor                                                                                                                                             |
| PRPPPPPP  | 853.5  | 8  | FCM19                  | 0.9494 | ACE inhibitor, dipeptidyl peptidase IV inhibitor,<br>alpha-glucosidase inhibitor, dipeptidyl peptidase<br>III inhibitor, neurolysin inhibitor                                                                          |
| PSPPPPPP  | 881.5  | 9  | FCM15,<br>19           | 0.9567 | ACE inhibitor, dipeptidyl peptidase IV inhibitor,<br>alpha-glucosidase inhibitor                                                                                                                                       |
| PWNHIKRYF | 1259.7 | 9  | FCM3, 7,<br>15, 17     | 0.8723 | ACE inhibitor, antioxidative, dipeptidyl peptidase<br>IV inhibitor                                                                                                                                                     |
| QFPFQFFQL | 1150.6 | 9  | FCM3, 7,<br>15, 17, 19 | 0.9491 | ACE inhibitor, dipeptidyl peptidase IV inhibitor,<br>dipeptidyl peptidase III inhibitor, pseudolysin<br>inhibitor, ACE2 inhibitor                                                                                      |
| RPPPPPP   | 853.5  | 8  | FCM7, 17               | 0.9471 | ACE inhibitor, dipeptidyl peptidase IV inhibitor,<br>alpha-glucosidase inhibitor, neurolysin inhibitor                                                                                                                 |
| SPPPPPP   | 881.5  | 9  | FCM3                   | 0.9624 | ACE inhibitor, dipeptidyl peptidase IV inhibitor,<br>alpha-glucosidase inhibitor                                                                                                                                       |
| TQFPQF    | 863.4  | 7  | FCM3                   | 0.8201 | ACE inhibitor, dipeptidyl peptidase IV inhibitor,<br>dipeptidyl peptidase III inhibitor, ACE2 inhibitor                                                                                                                |
| TQFPQFFQL | 1251.6 | 10 | FCM3, 7,<br>15, 17, 19 | 0.8173 | ACE inhibitor, dipeptidyl peptidase IV inhibitor,<br>dipeptidyl peptidase III inhibitor, ACE2 inhibitor,<br>pseudolysin inhibitor                                                                                      |
| VMPQWW    | 845.4  | 6  | FCM3, 7,<br>15, 17, 19 | 0.9366 | ACE inhibitor, dipeptidyl peptidase IV inhibitor,<br>inhibitor of tripeptidyl peptidase II                                                                                                                             |
| WYYPPQ    | 852.4  | 6  | FCM7, 17               | 0.8913 | ACE inhibitor, antioxidative, dipeptidyl peptidase<br>IV inhibitor, alpha-glucosidase inhibitor,<br>dipeptidyl peptidase III inhibitor                                                                                 |

WYYPPQVM

1082.5

8

FCM17,  
19

0.8435

ACE inhibitor, antioxidative, dipeptidyl peptidase  
IV inhibitor, alpha-glucosidase inhibitor,  
dipeptidyl peptidase III inhibitor, tubulin-tyrosine  
ligase inhibitor, inhibitor of tripeptidyl peptidase

II

(g)

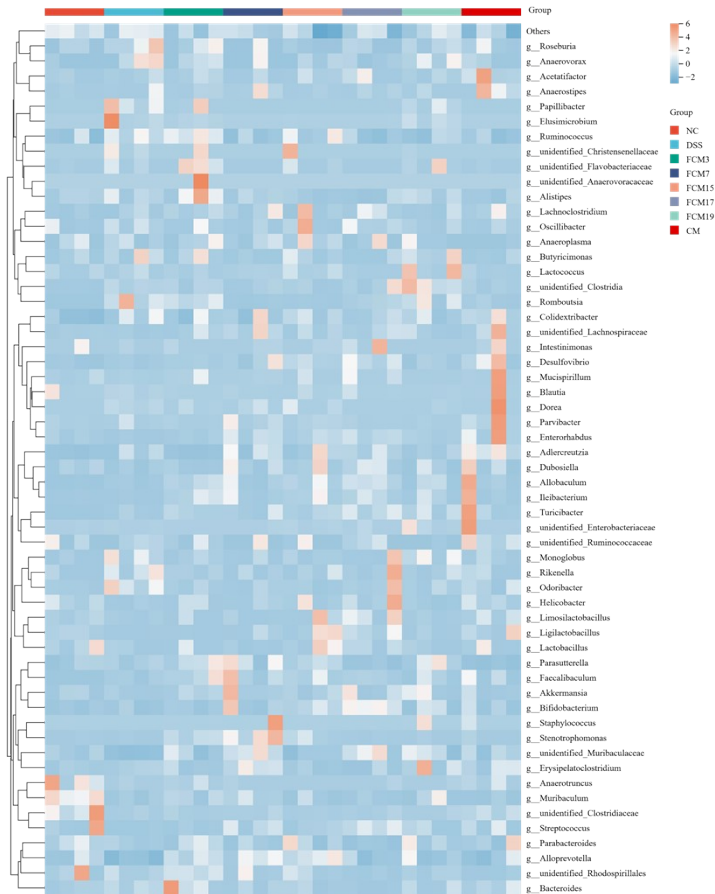

Figure S1 Distribution of intestinal microbiota at the family level. (g and h)
